# Supplementary material for: Pseudomonas Phage ZCPS1 Endolysin as a Potential Therapeutic Agent
Source: MDPI journal article supplement (doi:10.3390/v15020520), 2023-02-13
Supplement: s1 [file s1]

## Supplementary Tables:

**Table S1:** List of phage lysin proteins showing high sequence similarity with amino acid sequence of LysZC1 protein.

| Alignment no. | Description                                                                                           | Identity |
|---------------|-------------------------------------------------------------------------------------------------------|----------|
| Query_10001   | LysZC1                                                                                                | --       |
| Query_10002   | WP_015973755.1:1-165 glycoside hydrolase family protein [ <i>Klebsiella pneumoniae</i> ]              | 99.39 %  |
| Query_10003   | YP_007183210.1:1-165 glycoside hydrolase family protein [ <i>Pseudomonas</i> phage vB_PaeP_p2-10_Or1] | 98.79%   |
| Query_10004   | QIQ64397.1:1-165 lysozyme [ <i>Pseudomonas</i> phage Epa1]                                            | 98.37%   |
| Query_10005   | ATW62317.1:1-165 lysozyme [ <i>Pseudomonas</i> phage Delta]                                           | 97.58%   |
| Query_10006   | YP_009007856.1:1-165 glycoside hydrolase family protein [ <i>Pseudomonas</i> phage TL]                | 84.85%   |
| Query_10007   | QSH71737.1:1-123 lysozyme [ <i>Pseudomonas</i> phage vB_PaeP_fHoPae04]                                | 86.73%   |
| Query_10008   | YP_008857868.1:1-132 lysozyme [ <i>Pseudomonas</i> phage phiIBB-PAA2]                                 | 86.36%   |
| Query_10009   | YP_001671940.1:1-132 T4-like lysozyme [ <i>Bruynoghe</i> virus LUZ24]                                 | 85.61%   |
| Query_10010   | YP_009209320.1:1-132 baseplate hub protein [ <i>Pseudomonas</i> phage DL54]                           | 85.61%   |
| Query_10011   | QVJ13268.1:1-132 baseplate hub [ <i>Pseudomonas</i> phage PSA31]                                      | 84.85%   |
| Query_10012   | YP_006382529.1:1-166 lysozyme [ <i>Pseudomonas</i> phage tf]                                          | 63.86%   |
| Query_10013   | URG14323.1:1-113 lysozyme [ <i>Pseudomonas</i> phage vB_PaeP_PaCe]                                    | 86.73%   |
| Query_10014   | AYJ73846.1:1-113 baseplate hub protein [ <i>Pseudomonas</i> phage SaPL]                               | 86.73%   |
| Query_10015   | QDH46231.1:1-113 baseplate hub [ <i>Pseudomonas</i> virus Pa223]                                      | 86.73%   |
| Query_10016   | QDH46160.1:1-113 baseplate hub [ <i>Pseudomonas</i> virus Pa222]                                      | 86.73%   |
| Query_10017   | AWY03080.1:1-132 lysozyme [ <i>Pseudomonas</i> phage SCYZ1]                                           | 63.64%   |
| Query_10018   | YP_006907044.2:1-162 lysozyme [ <i>Pseudomonas</i> phage UFV-P2]                                      | 57.41%   |
| Query_10019   | UMO76430.1:1-128 lysozyme [ <i>Pseudomonas</i> phage Broder Salsa]                                    | 59.38%   |
| Query_10020   | YP_009622530.1:1-136 lysozyme [ <i>Pseudomonas</i> phage Bjorn]                                       | 56.62%   |
| Query_10021   | KAB2362637.1:1-81 lysozyme, partial [ <i>Escherichia coli</i> ]                                       | 82.72%   |

**Table S2:** List of templates with maximum similarity used for structural alignment with predicted LysZC1 model

| S. No. | Template protein structure                                                             | PDB ID | RMSD | TM score | Sequence Identity | Equivalent Residues | Reference Coverage | Target Coverage |
|--------|----------------------------------------------------------------------------------------|--------|------|----------|-------------------|---------------------|--------------------|-----------------|
| 1      | Lysozyme 056 from Deep neural language modeling                                        | 7RGR   | 3.03 | 0.67     | 27.63%            | 140                 | 85%                | 84%             |
| 2      | Crystal structure of a pesticin and T4-lysozyme chimera                                | 4ARJ   | 3.18 | 0.38     | 27.68%            | 144                 | 87%                | 45%             |
| 3      | Muramidase domain of SpmX from <i>Asticcacaulis excentricus</i>                        | 6H9D   | 2.52 | 0.73     | 34.52%            | 140                 | 85%                | 95%             |
| 4      | Endolysin from <i>Escherichia coli</i> O157:H7 phage FAHEc1                            | 7M5I   | 1.28 | 0.78     | 38.64%            | 138                 | 84%                | 86%             |
| 5      | Crystal structure of muramidase from <i>Acinetobacter baumannii</i> AB 5075UW prophage | 6ET6   | 1.36 | 0.79     | 27.08%            | 140                 | 85%                | 94%             |



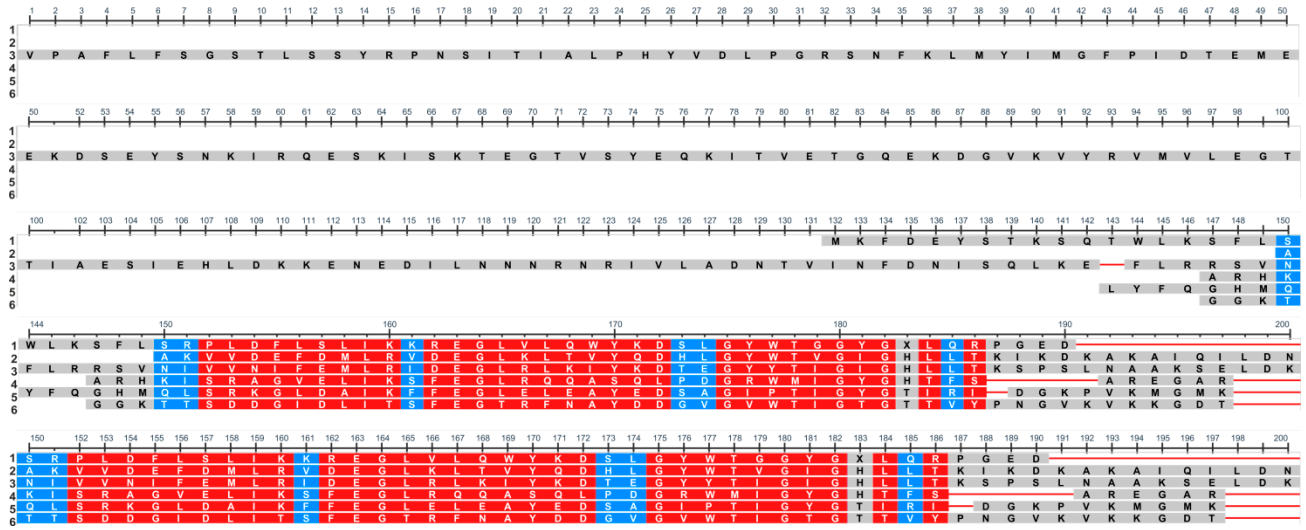

**Figure S2:** Constraint based multiple sequence alignment of LysZC1 with proteins showing sequence similarity and used for structural alignment. The highly and partially conserved residues are highlighted with red and blue colors, respectively. Lane 1 represents LysZC1 protein while lanes 2, 3, 4, 5, and 6 represent LysZC1 protein alignment with Lysozyme 056 from deep neural language modeling, T4-lysozyme, Muramidase domain of SpmX from *Asticacaulis excentricus*, Endolysin from *E. coli* O157:H7 phage FAHEc1, and Muramidase from *Acinetobacter baumannii* AB 5075UW prophage, respectively.

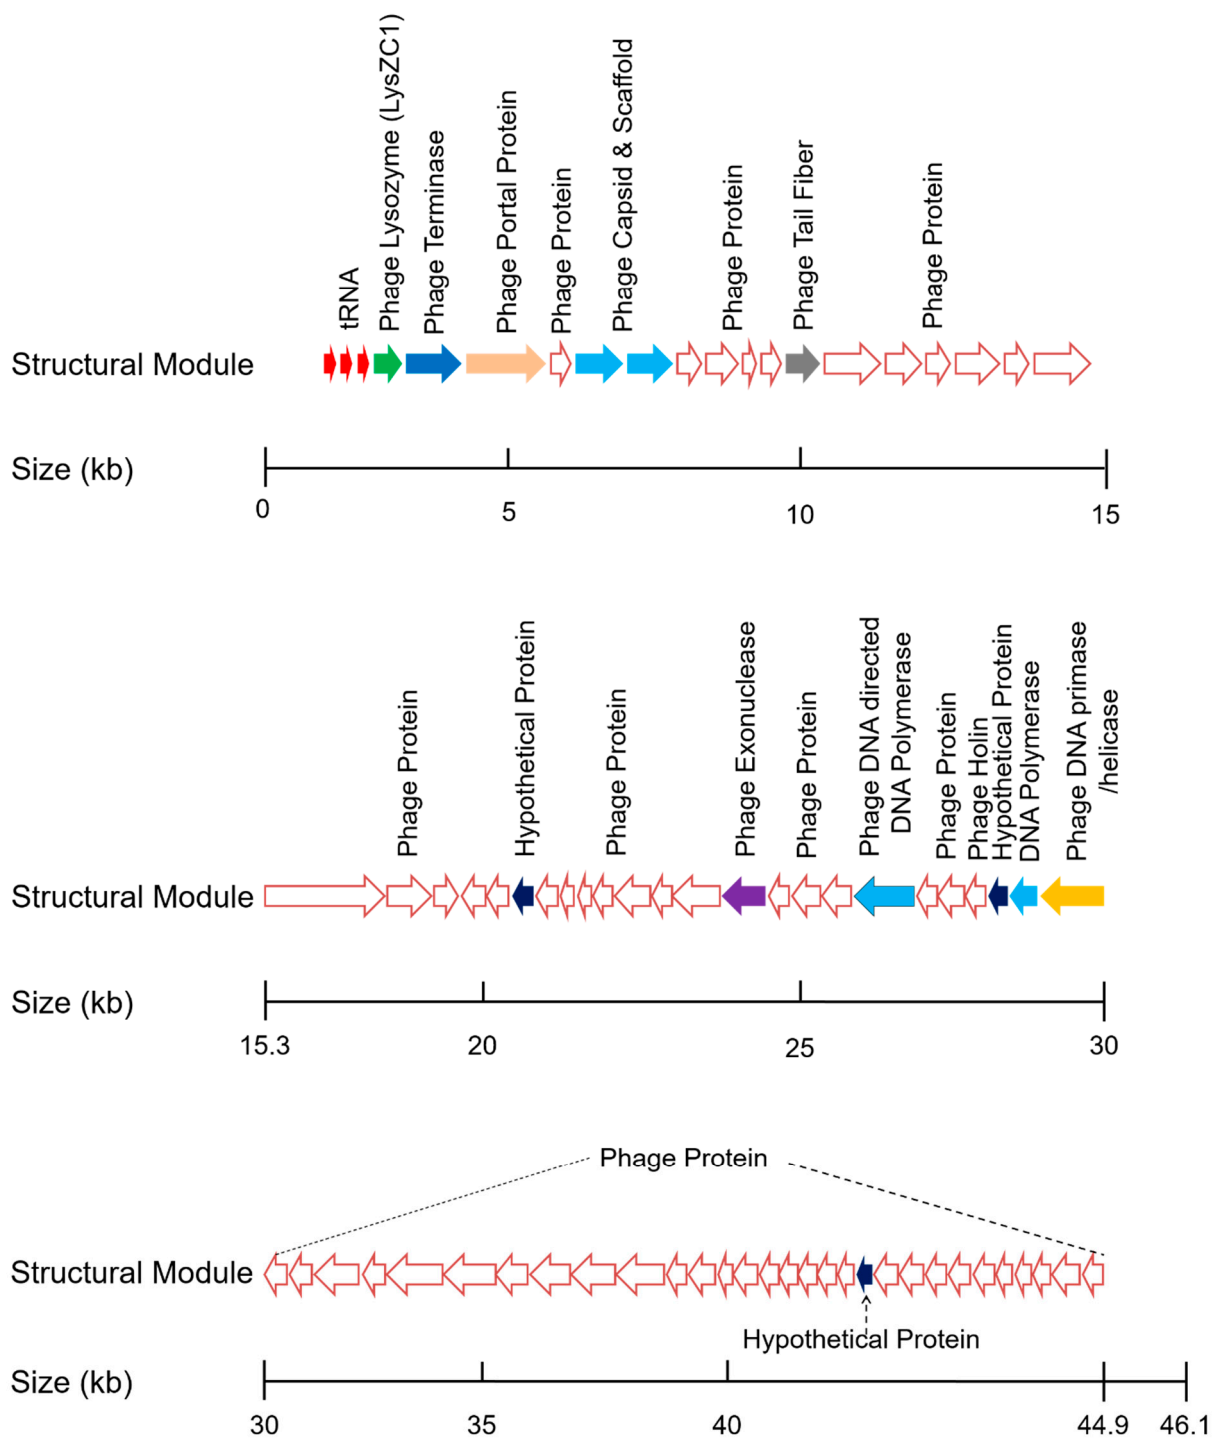

**Figure S3:** Schematic representation of the annotated genes of the structural module of ZCPS1 phage.
